# Supplementary material for: Electrocatalytic performance of different cobalt molybdate structures for water oxidation in alkaline media
Source: Royal Society of Chemistry journal article supplement (doi:10.1039/c8ce01073k), 2018-01-01
Supplement: c8ce01073k1.pdf [file c8ce01073k1.pdf]

## **Electronic Supplementary Information (ESI)**

# Electrocatalytic performance of different cobalt molybdate structures for the water oxidation in alkaline media

*Mariandry Rodriguez<sup>a</sup>, Matheus C. P. Stolzemburg<sup>a</sup>, Carlos G. O. Bruziquesi<sup>b</sup>, Adilson C. Silva<sup>b</sup>, Cíntia G. Abreu<sup>b</sup>, Kísla P. F. Siqueira<sup>b</sup>, Luiz C. A. Oliveira<sup>c</sup>, Máira S. Pires<sup>d</sup>, Lívia C. T. Lacerda<sup>d</sup>, Teodorico C. Ramalho<sup>d</sup>, Anderson Dias<sup>c</sup>, Márcio C. Pereira<sup>a,\*</sup>*

*<sup>a</sup>Instituto de Ciência, Engenharia e Tecnologia (ICET), Universidade Federal dos Vales do Jequitinhonha e Mucuri (UFVJM), 39803-371 Teófilo Otoni, Minas Gerais, Brazil*

*<sup>b</sup>Departamento de Química, Instituto de Ciências Exatas e Biológicas (ICEB), Universidade Federal de Ouro Preto (UFOP), 35400-000 Ouro Preto, Minas Gerais, Brazil*

*<sup>c</sup>Departamento de Química, Universidade Federal de Minas Gerais (UFMG), 31270-901 Belo Horizonte, Minas Gerais, Brazil*

*<sup>d</sup>Departamento de Química, Universidade Federal de Lavras (UFLA), 37200-000 Lavras, Minas Gerais, Brazil*

---

\* Corresponding author: Tel.: +55 33 3529 6037; Fax: +55 33 3529 6037 E-mail:

[mcpqui@gmail.com](mailto:mcpqui@gmail.com) (Márcio C. Pereira)

## Crystallographic data for the $\alpha$ -CoMoO<sub>4</sub>

**Space group:** C12/m1 or C2/m (#12)

**Table S1.** Lattice parameters for  $\alpha$ -CoMoO<sub>4</sub>.

| Lattice parameters | $a/\text{\AA}$ | $b/\text{\AA}$ | $c/\text{\AA}$ | $\alpha/^\circ$ | $\beta/^\circ$ | $\gamma/^\circ$ |
|--------------------|----------------|----------------|----------------|-----------------|----------------|-----------------|
|                    | 9.666(8)       | 8.854(8)       | 7.755(8)       | 90              | 113.82(20)     | 90              |

**Table S2.** Atomic positions for Co, Mo, and O in the  $\alpha$ -CoMoO<sub>4</sub> structure.

| Site label      | x      | y      | z      | Occupancy |
|-----------------|--------|--------|--------|-----------|
| Co <sub>1</sub> | 0.3108 | 0      | 0.1555 | 1         |
| Co <sub>2</sub> | 0      | 0.3094 | 0.5000 | 1         |
| Mo <sub>1</sub> | 0.2844 | 0      | 0.6391 | 1         |
| Mo <sub>2</sub> | 0      | 0.2852 | 0      | 1         |
| O <sub>1</sub>  | 0.5035 | 0.1515 | 0.2395 | 1         |
| O <sub>2</sub>  | 0.1528 | 0.1656 | 0.0772 | 1         |
| O <sub>3</sub>  | 0.1642 | 0.1534 | 0.5815 | 1         |
| O <sub>4</sub>  | 0.3476 | 0      | 0.4376 | 1         |
| O <sub>5</sub>  | 0.3487 | 0      | 0.9156 | 1         |

## Crystallographic data for the $\beta$ -CoMoO<sub>4</sub>

**Space group:** C12/m1 ou C2/m (#12)

**Table S3.** Lattice parameters for  $\beta$ -CoMoO<sub>4</sub>.

| Lattice    | $a/\text{\AA}$ | $b/\text{\AA}$ | $c/\text{\AA}$ | $\alpha/^\circ$ | $\beta/^\circ$ | $\gamma/^\circ$ |
|------------|----------------|----------------|----------------|-----------------|----------------|-----------------|
| parameters | 10.251(1)      | 9.294(1)       | 7.0452(9)      | 90              | 106.962(8)     | 90              |

**Table S4.** Atomic positions for Co, Mo, and O in the  $\beta$ -CoMoO<sub>4</sub> structure.

| Site_label      | x       | y       | z       | Occupancy |
|-----------------|---------|---------|---------|-----------|
| Co <sub>1</sub> | 0.30066 | 0       | 0.14516 | 0.5       |
| Co <sub>2</sub> | 0       | 0.32042 | 0.5     | 0.5       |
| Mo <sub>1</sub> | 0.22885 | 0       | 0.5958  | 0.5       |
| Mo <sub>2</sub> | 0       | 0.24749 | 0       | 0.5       |
| O <sub>1</sub>  | 0.45942 | 0.1576  | 0.20923 | 1         |
| O <sub>2</sub>  | 0.14132 | 0.13771 | 0.1122  | 1         |
| O <sub>3</sub>  | 0.13407 | 0.15539 | 0.53103 | 1         |
| O <sub>4</sub>  | 0.35476 | 0       | 0.45854 | 0.5       |
| O <sub>5</sub>  | 0.29853 | 0       | 0.85499 | 0.5       |

## Crystallographic data for the H-CoMoO<sub>4</sub>

**Space group:** P-1 (#2)

**Table S5.** Lattice parameters for H-CoMoO<sub>4</sub>.

| <b>Lattice parameters</b> | <b><i>a</i>/Å</b> | <b><i>b</i>/Å</b> | <b><i>c</i>/Å</b> | <b><i>α</i>/°</b> | <b><i>β</i>/°</b> | <b><i>γ</i>/°</b> |
|---------------------------|-------------------|-------------------|-------------------|-------------------|-------------------|-------------------|
|                           | 6.844             | 6.933             | 9.339             | 76.617            | 84.188            | 74.51             |

**Table S6.** Atomic positions for Co, Mo, and O in the H-CoMoO<sub>4</sub> structure.

| <b>Site label</b>     | <b>x</b> | <b>y</b> | <b>z</b> | <b>Occupancy</b> |
|-----------------------|----------|----------|----------|------------------|
| <b>Co<sub>1</sub></b> | 0.1542   | 0.6464   | 0.6992   | 1                |
| <b>Co<sub>2</sub></b> | 0.1961   | 0.8287   | 0.9728   | 1                |
| <b>Mo<sub>1</sub></b> | 0.0059   | 0.1935   | 0.6845   | 1                |
| <b>Mo<sub>2</sub></b> | 0.2482   | 0.2943   | 0.0522   | 1                |
| <b>O<sub>1</sub></b>  | 0.1446   | 0.9280   | 0.7475   | 1                |
| <b>O<sub>2</sub></b>  | 0.1573   | 0.3643   | 0.6741   | 1                |
| <b>O<sub>3</sub></b>  | 0.9176   | 0.2209   | 0.5124   | 1                |
| <b>O<sub>4</sub></b>  | 0.7895   | 0.2633   | 0.8022   | 1                |
| <b>O<sub>5</sub></b>  | 0.2056   | 0.5466   | 0.9299   | 1                |
| <b>O<sub>6</sub></b>  | 0.1285   | 0.1367   | 0.9836   | 1                |
| <b>O<sub>7</sub></b>  | 0.1590   | 0.3092   | 0.2306   | 1                |
| <b>O<sub>8</sub></b>  | 0.5049   | 0.1893   | 0.0581   | 1                |
| <b>O<sub>9</sub></b>  | 0.4686   | 0.5953   | 0.6313   | 1                |
| <b>O<sub>10</sub></b> | 0.5430   | 0.9860   | 0.5430   | 0.5              |

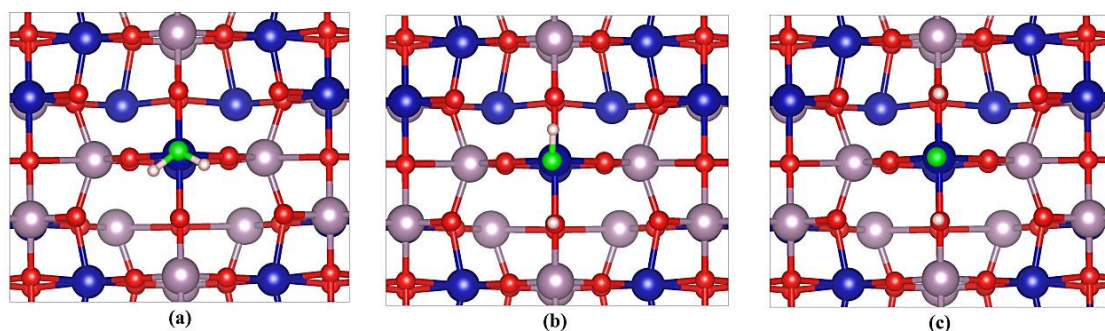

**Figure S1.** Representation of the water dissociation mechanism at the Co site on the (110) surface of the  $\alpha$ -CoMoO<sub>4</sub> catalyst. (a) intermediate I<sub>1</sub>, (b) I<sub>2</sub>, and (c) I<sub>3</sub>. Atoms: red = surface oxygens, blue = cobalt, gray = molybdenum, green = oxygen of the water molecule, and white = hydrogen.

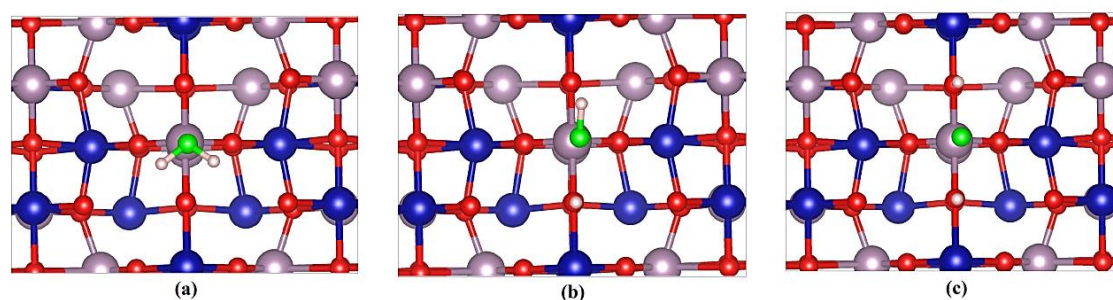

**Figure S2.** Representation of the water dissociation mechanism at the Mo site on the (110) surface of the  $\alpha$ -CoMoO<sub>4</sub> catalyst. (a) intermediate I<sub>1</sub>, (b) I<sub>2</sub>, and (c) I<sub>3</sub>. Atoms: red = surface oxygens, blue = cobalt, gray = molybdenum, green = oxygen of the water molecule, and white = hydrogen.

**Table S7.** Adsorption energy ( $E_{\text{ads}}$ ) and energy changes involved in the steps of water dissociation ( $\Delta E_1$  and  $\Delta E_2$ ) on CoMoO<sub>4</sub>.

| Site    | $E_{\text{ads}}$ (eV) | $\Delta E_1$ (eV) | $\Delta E_2$ (eV) |
|---------|-----------------------|-------------------|-------------------|
| Co-site | -0.69                 | +0.22             | +0.25             |
| Mo-site | -0.63                 | +0.24             | +0.28             |
